# Supplementary material
Source: MDPI journal article supplement (https://www.mdpi.com/2073-4433/10/12/772)
Supplement: s1 [file s1]

# Supplementary Material: Nanoparticle Behaviour in an Urban Street Canyon at Different Heights and Implications on Indoor Respiratory Doses

Maurizio Manigrasso <sup>1,\*</sup>, Carmela Protano <sup>2</sup>, Matteo Vitali <sup>2</sup> and Pasquale Avino <sup>3</sup>

<sup>1</sup> Department of Technological Innovations, INAIL, 00143 Rome, Italy; m.manigrasso@inail.it

<sup>2</sup> Department of Public Health and Infectious Diseases, Sapienza University of Rome, 00185 Rome, Italy; carmela.protano@uniroma1.it; matteo.vitali@uniroma1.it

<sup>3</sup> Department of Agricultural, Environmental and Food Sciences (DiAAA), University of Molise, 86100 Campobasso, Italy; avino@unimol.it

\* Correspondence: m.manigrasso@inail.it

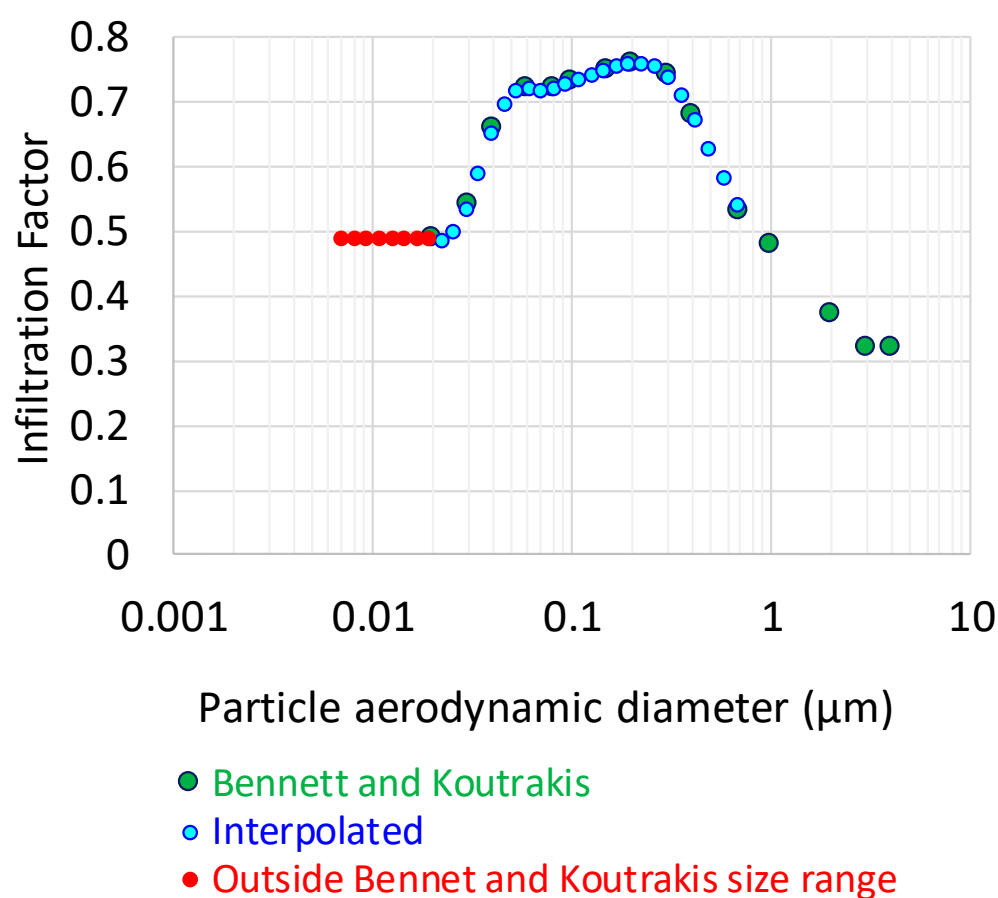

**Figure 1.** Infiltration factors ( $F_{in}$ ) estimated by interpolation of the average  $F_{in}$  measured by Bennett and Koutrakis [30]. For aerodynamic diameters (0.01–0.02 μm) outside the authors' measurement range the  $F_{in}$  value of 0.02 μm particles was adopted.

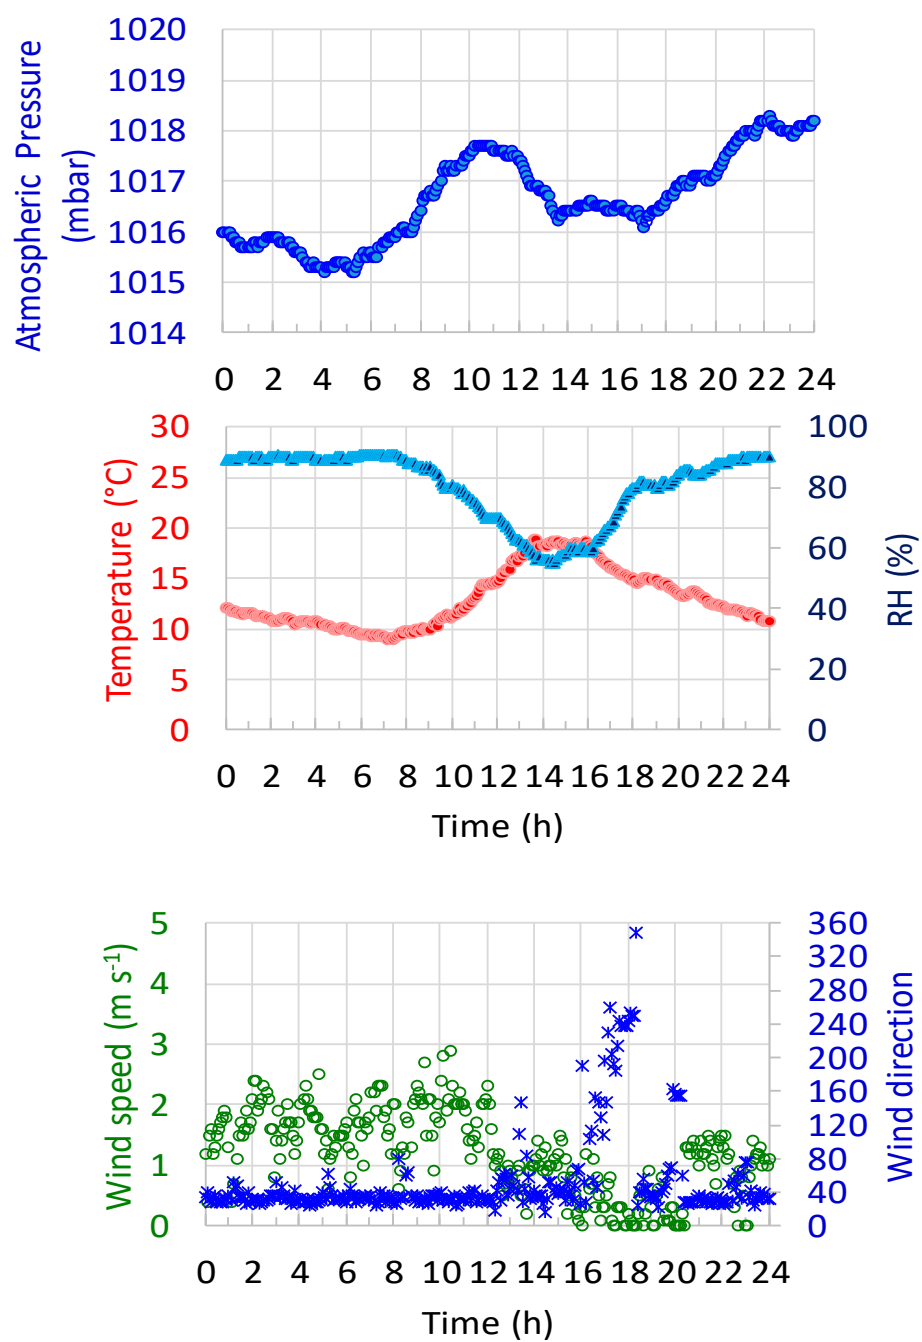

**Figure 2.** Atmospheric pressure, Temperature, Relative humidity, wind speed and wind direction throughout the aerosol measurements (averaging time 5 min).
